# Supplementary material
Source: publisher figshare collection journal article supplement (https://gsajournals.figshare.com/articles/dataset/_/6553670)
Supplement: Supplementary file 1 [file 1]

**
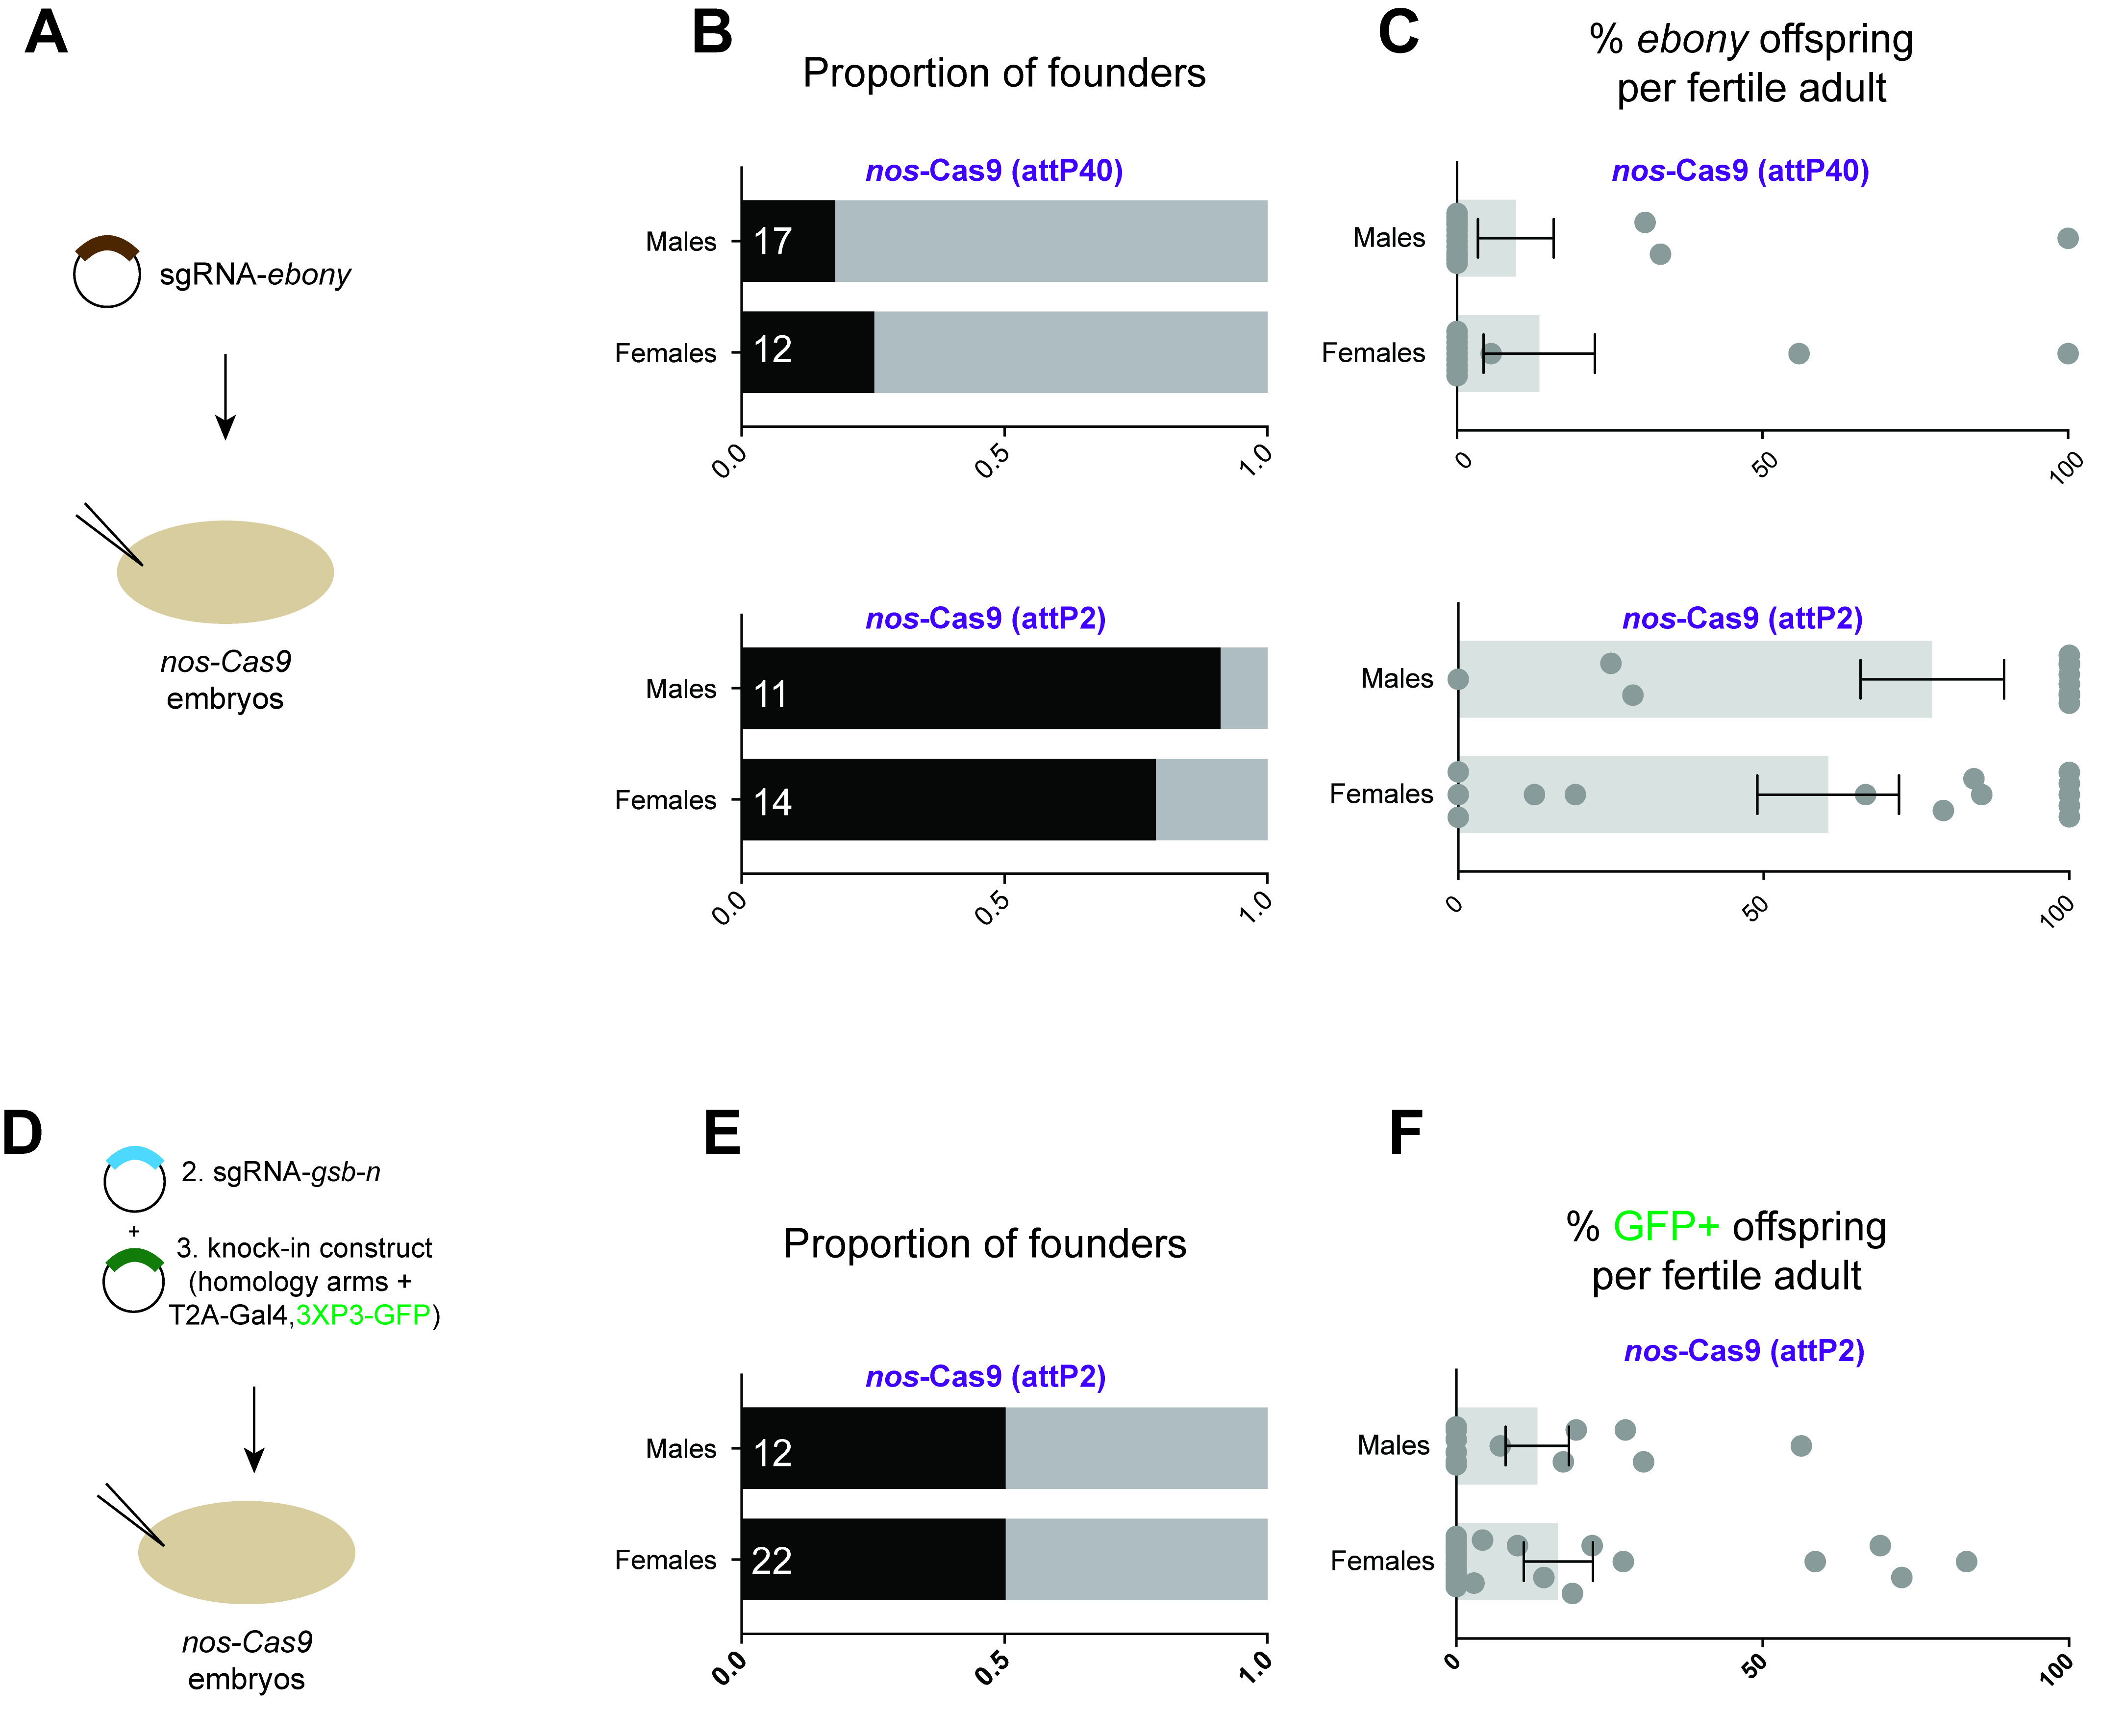
**

**Figure S1. CRISPR mutagenesis is not inherently sex-biased in *Drosophila.*** (A) Schematic of a standard CRISPR mutagenesis experiment, absent *ovoD* co-selection, in which an sgRNA targeting *ebony* is injected into a *nos-Cas9* embryo. For two separate *nos-Cas9* lines (in the attP40 and attP2 landing sites, respectively), the proportion of founders (B) and *ebony* offspring per founder (C) are not female-biased. Note that the attP2 nos-Cas9 line is used in all other experiments in this study. (D-F) Control knock-in experiment, using the same sgRNA and donor shown in Figure 4B, but absent *ovoD* co-selection.
